# Supplementary material for: Do Protected Areas Matter? A Systematic Review of the Social and Ecological Impacts of the Establishment of Protected Areas
Source: PubMed Central journal article supplement (PMC7579073; doi:10.3390/ijerph17197259), 2020-10-04
Supplement: ijerph-17-07259-s001.pdf [file ijerph-17-07259-s001.pdf]

## List of articles covered in this study

- [1] Andam, K. S., Ferraro, P. J., & Hanauer, M. M. (2013). The effects of protected area systems on ecosystem restoration: a quasi-experimental design to estimate the impact of Costa Rica's protected area system on forest regrowth. *Conservation Letters*, 6(5), 317-323.
- [2] Andam, K. S., Ferraro, P. J., Sims, K. R., Healy, A., & Holland, M. B. (2010). Protected areas reduced poverty in Costa Rica and Thailand. *Proceedings of the National Academy of Sciences*, 107(22), 9996-10001.
- [3] Blackman, A., Pfaff, A., & Robalino, J. (2015). Paper park performance: Mexico's natural protected areas in the 1990s. *Global Environmental Change*, 31, 50-61.
- [4] Canavire-Bacarreza, G., & Hanauer, M. M. (2013). Estimating the impacts of Bolivia's protected areas on poverty. *World Development*, 41, 265-285.
- [5] Clements, T., Suon, S., Wilkie, D. S., & Milner-Gulland, E. J. (2014). Impacts of protected areas on local livelihoods in Cambodia. *World Development*, 64, S125-S134.
- [6] den Braber, B., Evans, K. L., & Oldekop, J. A. (2018). Impact of protected areas on poverty, extreme poverty, and inequality in Nepal. *Conservation Letters*, 11(6), e12576.
- [7] Duan, W., & Wen, Y. (2017). Impacts of protected areas on local livelihoods: Evidence of giant panda biosphere reserves in Sichuan Province, China. *Land Use Policy*, 68, 168-178.
- [8] Ferraro, P. J., & Hanauer, M. M. (2011). Protecting ecosystems and alleviating poverty with parks and reserves: 'win-win' or tradeoffs? *Environmental and resource economics*, 48(2), 269-286.
- [9] Ferraro, P. J., Hanauer, M. M., & Sims, K. R. (2011). Conditions associated with protected area success in conservation and poverty reduction. *Proceedings of the National Academy of Sciences*, 108(34), 13913-13918.
- [10] Ferraro, P. J., Hanauer, M. M., Miteva, D. A., Canavire-Bacarreza, G. J., Pattanayak, S. K., & Sims, K. R. (2013). More strictly protected areas are not necessarily more protective: evidence from Bolivia, Costa Rica, Indonesia, and Thailand. *Environmental Research Letters*, 8(2), 025011.
- [11] Ferraro, P. J., Hanauer, M. M., Miteva, D. A., Nelson, J. L., Pattanayak, S. K., Nolte, C., & Sims, K. R. (2015). Estimating the impacts of conservation on ecosystem services and poverty by integrating modeling and evaluation. *Proceedings of the National Academy of Sciences*, 112(24), 7420-7425.
- [12] Hanauer, M. M., & Canavire-Bacarreza, G. (2015). Implications of heterogeneous impacts of protected areas on deforestation and poverty. *Philosophical Transactions of the Royal Society B: Biological Sciences*, 370(1681), 20140272.
- [13] Haruna, A., Pfaff, A., Van den Ende, S., & Joppa, L. (2014). Evolving protected-area impacts in Panama: impact shifts show that plans require anticipation. *Environmental Research Letters*, 9(3), 035007.
- [14] Jiao, X., Walelign, S. Z., Nielsen, M. R., & Smith-Hall, C. (2019). Protected areas, household environmental incomes and well-being in the Greater Serengeti-Mara Ecosystem. *Forest Policy and Economics*, 106, 101948.
- [15] Kari, F. B., Masud, M. M., Yahaya, S. R. B., & Saifullah, M. K. (2016). Poverty within watershed and environmentally protected areas: the case of the indigenous community in Peninsular Malaysia. *Environmental monitoring and assessment*, 188(3), 173.
- [16] Le, H. D., Smith, C., & Herbohn, J. (2014). What drives the success of reforestation projects

- in tropical developing countries? The case of the Philippines. *Global Environmental Change*, 24, 334-348.
- [17] Ma, B., Cai, Z., Zheng, J., & Wen, Y. (2019). Conservation, ecotourism, poverty, and income inequality—A case study of nature reserves in Qinling, China. *World Development*, 115, 236-244.
- [18] Manejar, A. J. A., Sandoy, L. M. H., & Subade, R. F. (2019). Linking marine biodiversity conservation and poverty alleviation: A case study in selected rural communities of Sagay Marine Reserve, Negros Occidental. *Marine Policy*, 104, 12-18.
- [19] Miranda, J. J., Corral, L., Blackman, A., Asner, G., & Lima, E. (2016). Effects of protected areas on forest cover change and local communities: evidence from the Peruvian Amazon. *World Development*, 78, 288-307.
- [20] Naughton-Treves, L., Alix-Garcia, J., & Chapman, C. A. (2011). Lessons about parks and poverty from a decade of forest loss and economic growth around Kibale National Park, Uganda. *Proceedings of the National Academy of Sciences*, 108(34), 13919-13924.
- [21] Panlasigui, S., Rico-Straffon, J., Pfaff, A., Swenson, J., & Loucks, C. (2018). Impacts of certification, uncertified concessions, and protected areas on forest loss in Cameroon, 2000 to 2013. *Biological conservation*, 227, 160-166.
- [22] Pfaff, A., Robalino, J., Herrera, D., & Sandoval, C. (2015). Protected areas' impacts on Brazilian Amazon deforestation: examining conservation–development interactions to inform planning. *PloS one*, 10(7), e0129460.
- [23] Pfaff, A., Robalino, J., Sandoval, C., & Herrera, D. (2015). Protected area types, strategies and impacts in Brazil's Amazon: public protected area strategies do not yield a consistent ranking of protected area types by impact. *Philosophical Transactions of the Royal Society B: Biological Sciences*, 370(1681), 20140273.
- [24] Pour, M. D., Motiee, N., Barati, A. A., Taheri, F., Azadi, H., Gebrehiwot, K., ... & Witlox, F. (2017). Impacts of the Hara biosphere reserve on livelihood and welfare in Persian Gulf. *Ecological economics*, 141, 76-86.
- [25] Robalino, J., & Villalobos, L. (2015). Protected areas and economic welfare: an impact evaluation of national parks on local workers' wages in Costa Rica. *Environment and Development Economics*, 20(3), 283-310.
- [26] Sims, K. R. (2010). Conservation and development: Evidence from Thai protected areas. *Journal of Environmental Economics and Management*, 60(2), 94-114.
- [27] Sims, K. R. (2014). Do protected areas reduce forest fragmentation? A microlandscapes approach. *Environmental and Resource Economics*, 58(2), 303-333.
- [28] Sims, K. R., & Alix-Garcia, J. M. (2017). Parks versus PES: Evaluating direct and incentive-based land conservation in Mexico. *Journal of Environmental Economics and Management*, 86, 8-28.
- [29] Sims, K. R., Thompson, J. R., Meyer, S. R., Nolte, C., & Plisinski, J. S. (2019). Assessing the local economic impacts of land protection. *Conservation Biology*. (online)
- [30] Yuan, J., Dai, L., & Wang, Q. (2008). State-led ecotourism development and nature conservation: A case study of the Changbai Mountain Biosphere Reserve, China. *Ecology and Society*, 13(2).
- [31] Zhang, Q., Bilsborrow, R. E., Song, C., Tao, S., & Huang, Q. (2019). Rural household income distribution and inequality in China: Effects of payments for ecosystem services policies and

other factors. *Ecological Economics*, 160, 114-127.
